# Supplementary material for: Viral diversity in wild rodents in the regions of Canaã de Carajás and Curionopólis, State of Pará, Brazil
Source: Frontiers journal article supplement (doi:10.3389/fmicb.2024.1502462), 2025-01-07
Supplement: Image_1.pdf [file Image_1.pdf]

**A**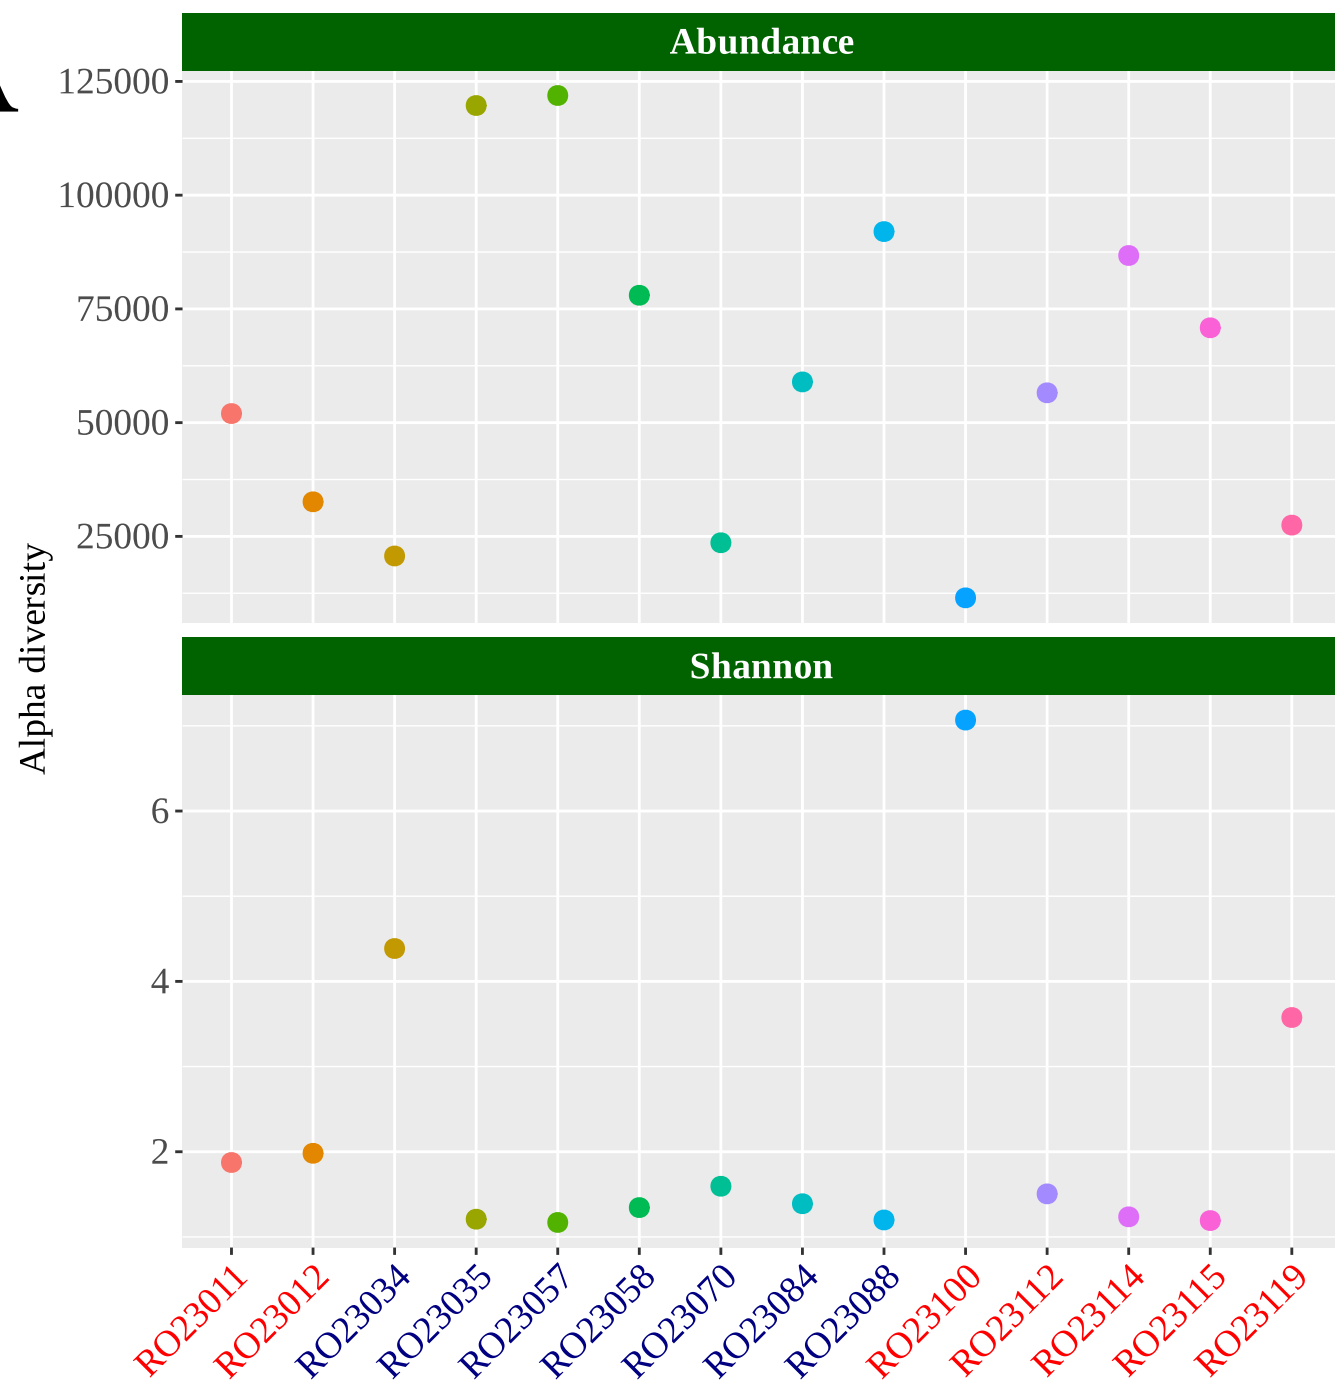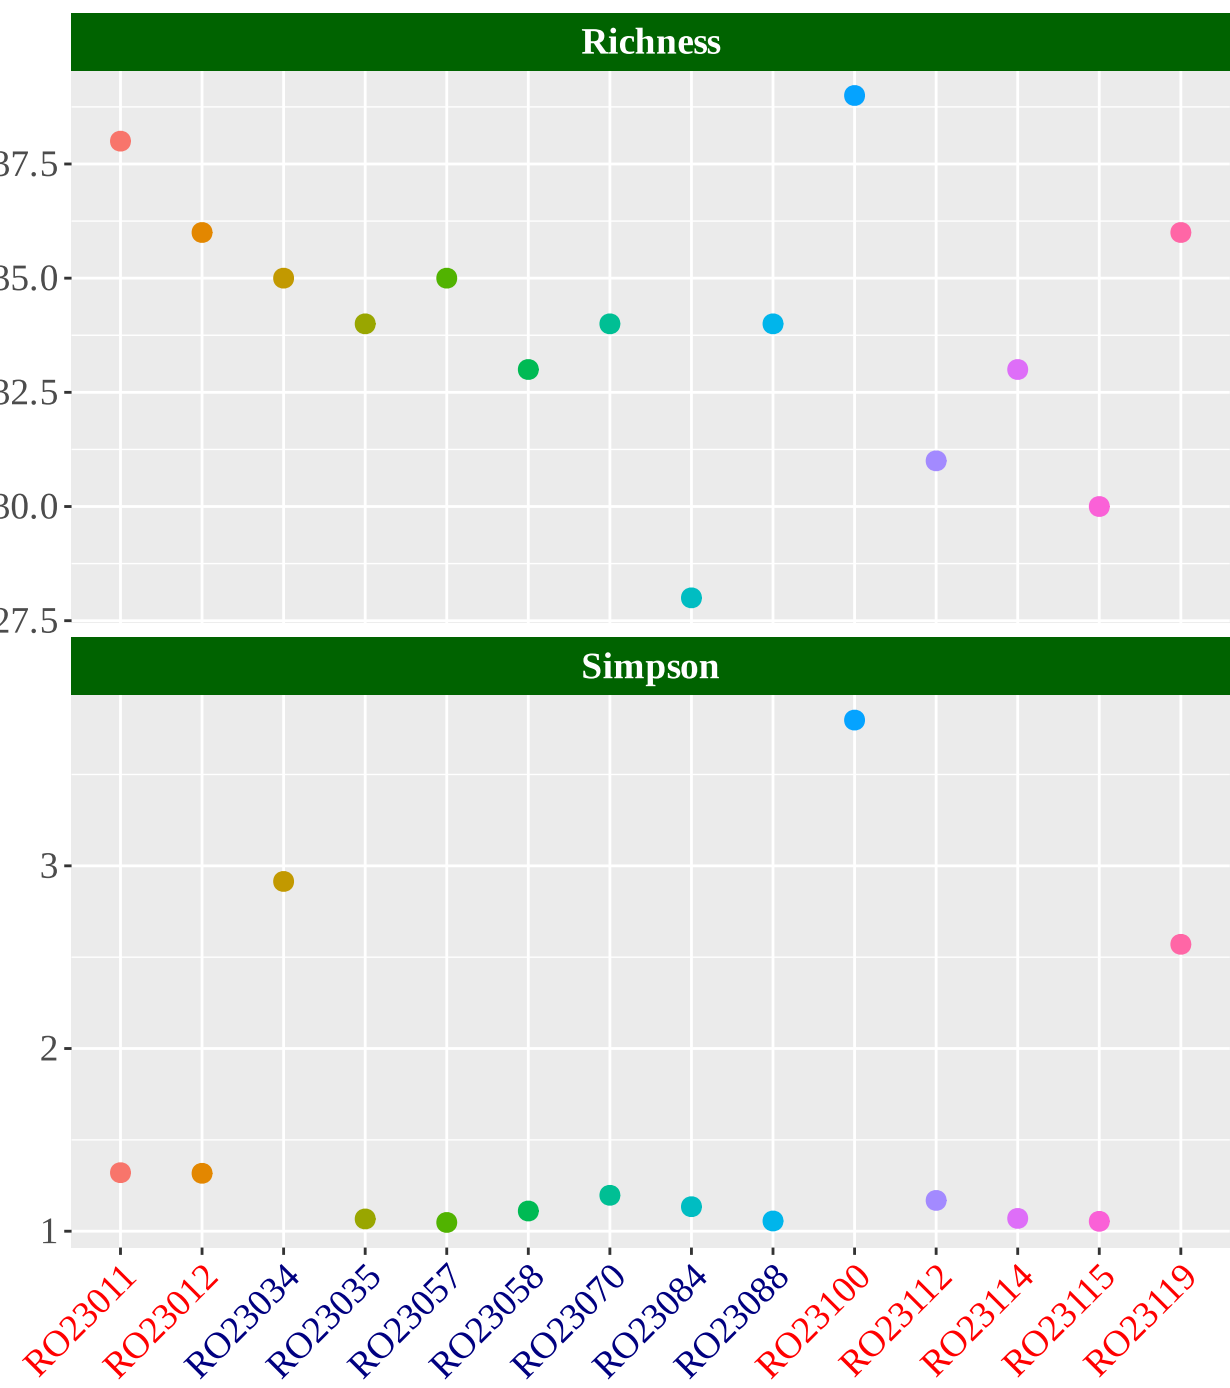**B**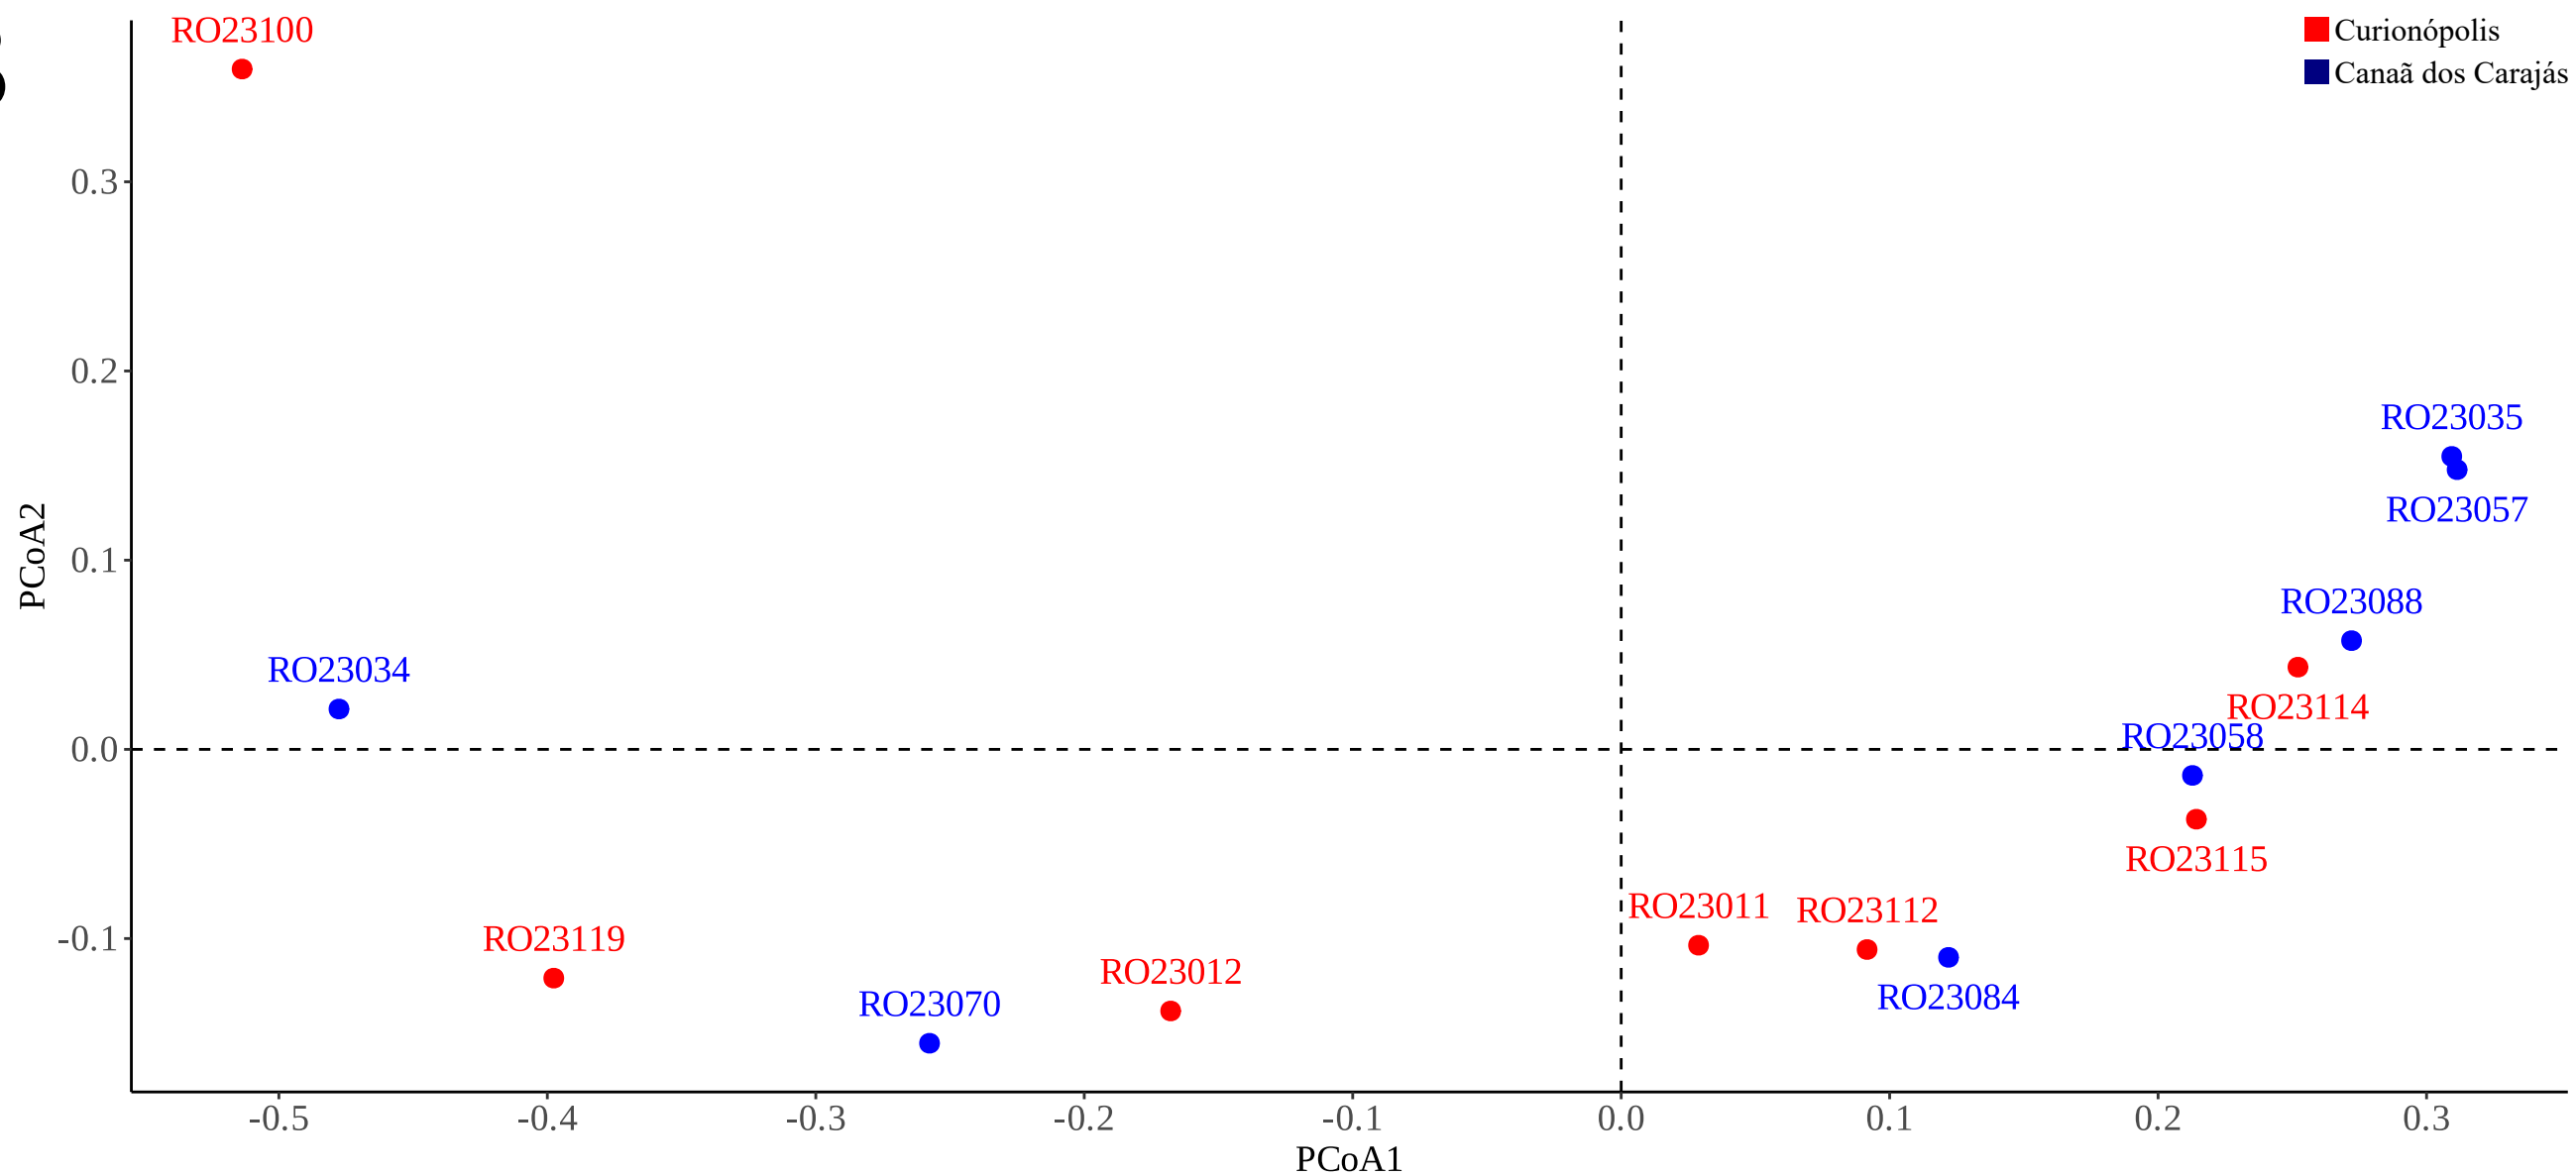

**Supplementary Figure 1.**(A) Alpha diversity plots showing abundance, richness, and the Shannon and Simpson diversity indices. (B) Principal component analysis (PCoA) based on the Bray-Curtis dissimilarity matrix. Samples from the Canaã dos Carajás and Curionópolis regions are highlighted in blue and red, respectively.
