# Supplementary material for: Viral diversity in wild rodents in the regions of Canaã de Carajás and Curionopólis, State of Pará, Brazil
Source: Frontiers journal article supplement (doi:10.3389/fmicb.2024.1502462), 2025-01-07
Supplement: Image_2.pdf [file Image_2.pdf]

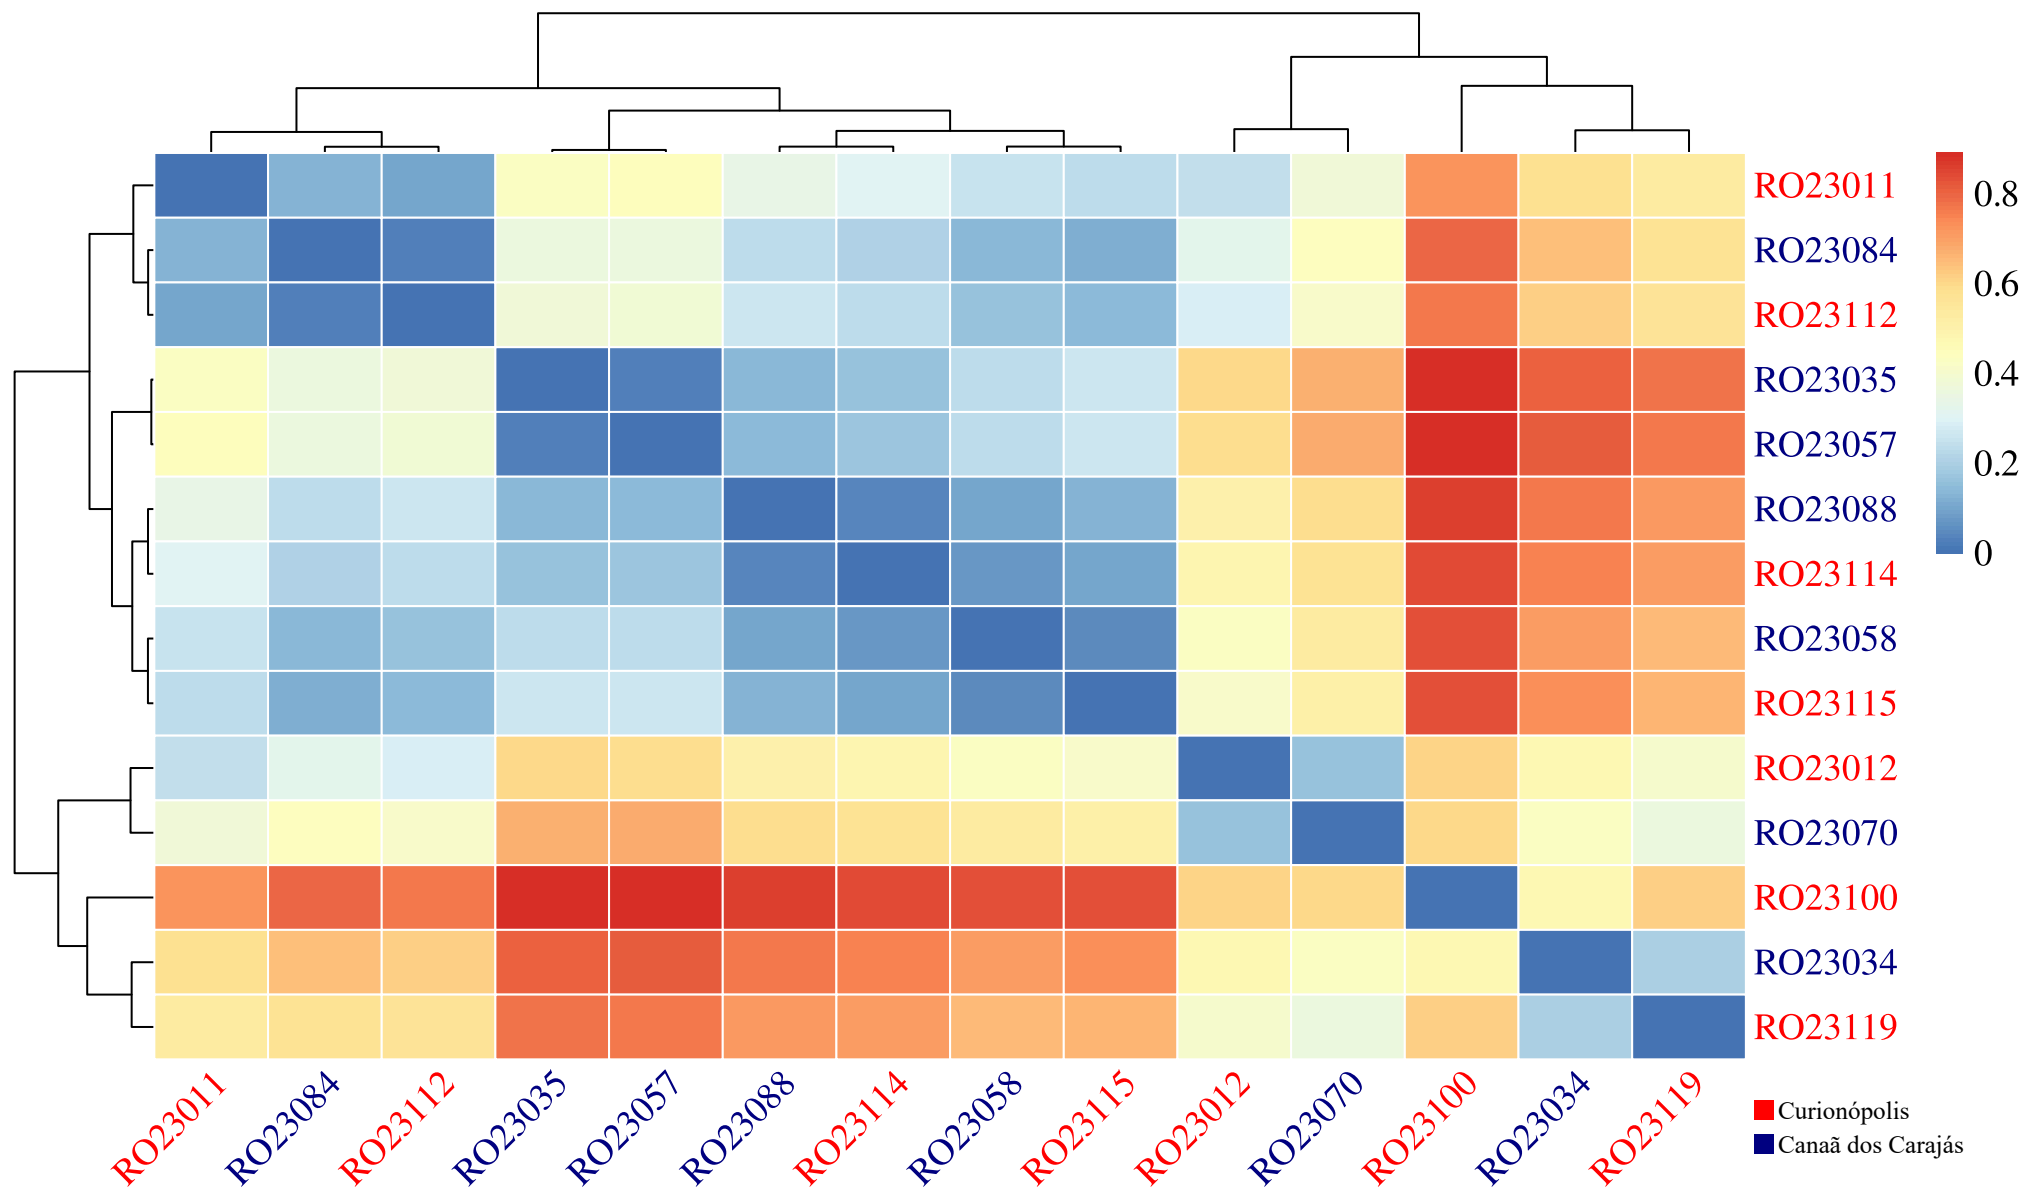

**Supplementary figure 2.** Bray-Curtis dissimilarity matrix, based on the comparison of diversity metrics of viral reads found in the evaluated samples.
