# Supplementary material for: Viral diversity in wild rodents in the regions of Canaã de Carajás and Curionopólis, State of Pará, Brazil
Source: Front Microbiol. 2025 Jan 7;15:1502462. doi: 10.3389/fmicb.2024.1502462 (PMC11747277; doi:10.3389/fmicb.2024.1502462)
Supplement: Supplementary file 1 [file Table_1.xlsx]

## Sheet: Table S1
Table S1. Quantitative of species collected (and initially identified by karyotype) and tested by ELISA
Species	Local		Total
	Canaã dos Carajás	Curionópolis
Akodon sp.	1	2	3
Calomys callosus	2	0	2
Euryzomys sp.	7	0	7
Mus musculus	1	0	1
Necromys lasiurus	17	21	38
Oecomys sp.	0	1	1
Oligoryzomys microtis	1	0	1
Oligoryzomys sp.	1	6	7
Oxymycterus amazonicus	5	8	13
Proechimys cuvieri	0	2	2
Proechimys roberti	11	16	27
Total	46	56	102
