# Supplementary material for: Viral diversity in wild rodents in the regions of Canaã de Carajás and Curionopólis, State of Pará, Brazil
Source: Front Microbiol. 2025 Jan 7;15:1502462. doi: 10.3389/fmicb.2024.1502462 (PMC11747277; doi:10.3389/fmicb.2024.1502462)
Supplement: Supplementary file 2 [file Table_2.xlsx]

## Sheet: Table S2
Table S2. Samples considered for sequencing and identified based on the CytB gene
Sample	Morphology	Locality	Year	CytB	Identity	Rawdata	Fastp	SortMeRNA	Validated (%)
RO23011	Oxymycterus amazonicus	Curionópolis	2017	Oxymycterus amazonicus	99.65	44015892	39845288	36148922	82.1
RO23012	Oxymycterus amazonicus	Curionópolis	2017	Oxymycterus amazonicus	99.74	37053484	33342348	22380690	60.4
RO23034	Proechimys roberti	Canaã dos Carajás	2018	Proechimys roberti	99.13	30294512	27640128	25819714	85.2
RO23035	Oligoryzomys microtis	Canaã dos Carajás	2018	Oecomys bicolor	99.11	28749114	25273908	23895562	83.1
RO23057	Oryzomys sp.	Canaã dos Carajás	2018	Oryzomys megacephalus	99.38	39232236	35755570	35636748	90.8
RO23058	Necromys lasiurus	Canaã dos Carajás	2018	Necromys lasiurus	99.88	42342026	39591238	39030622	92.2
RO23070	Calomys callosus	Canaã dos Carajás	2018	Calomys callosus	99.39	30901984	26513670	26068940	84.4
RO23084	Akodon sp.	Canaã dos Carajás	2018	Akodon cursor	94.9	54794836	48889356	48646302	88.8
RO23088	Oligoryzomys sp.	Canaã dos Carajás	2018	Oligoryzomys microtis	99.56	32193176	28826200	26801048	83.3
RO23100	Necromys lasiurus	Curionópolis	2019	Necromys lasiurus	99.5	36710970	33014678	3934926	10.7
RO23112	Akodon sp.	Curionópolis	2019	Akodon cursor	94.99	68002158	57826860	56241174	82.7
RO23114	Oecomys sp.	Curionópolis	2019	Oryzomys megacephalus	99.5	30536556	28320106	25465126	83.4
RO23115	Oligoryzomys sp.	Curionópolis	2019	Oligoryzomys microtis	98.86	23738610	21354480	20892888	88
RO23119	Proechimys cuvieri	Curionópolis	2019	Proechimys cuvieri	97.98	21625214	19551836	18111650	83.8
