# Supplementary material for: Viral diversity in wild rodents in the regions of Canaã de Carajás and Curionopólis, State of Pará, Brazil
Source: Front Microbiol. 2025 Jan 7;15:1502462. doi: 10.3389/fmicb.2024.1502462 (PMC11747277; doi:10.3389/fmicb.2024.1502462)
Supplement: Supplementary file 3 [file Table_3.xlsx]

## Sheet: Table S3
Table S3. Quantitative of classified viral readings
Family	RO23011	RO23012	RO23034	RO23035	RO23057	RO23058	RO23070	RO23084	RO23088	RO23100	RO23112	RO23114	RO23115	RO23119
Alloherpesviridae	11	12	10	6	3	3	2	2	6	25	5	2	2	3
Allomimiviridae	11	15	14	5	3	8	4	2	8	55	11	8	2	17
Anelloviridae	1	0	0	0	0	0	0	0	2	0	0	0	0	1
Ascoviridae	7	8	7	5	10	7	6	9	14	27	13	3	6	6
Asfarviridae	3	0	1	2	0	0	1	0	0	2	0	0	0	1
Autographiviridae	2	0	0	1	0	1	1	0	0	2	0	0	0	0
Baculoviridae	1620	1194	5577	669	1128	2013	722	2101	815	218	2025	870	696	8123
Coronaviridae	3	5	1	1	3	1	3	0	0	2	5	0	1	5
Fiersviridae	5	2	0	1	0	0	0	0	0	1	0	0	0	0
Filoviridae	1	5	0	1	0	4	2	3	4	1	1	3	0	0
Flaviviridae	56	119	78	25	23	20	15	14	23	328	43	23	15	86
Geminiviridae	1	0	1	0	0	4	1	3	0	0	0	0	0	2
Hepeviridae	15	65	113	10	9	20	3	10	9	128	16	16	9	118
Herelleviridae	4	2	0	1	1	2	3	0	1	5	1	0	0	3
Hytrosaviridae	6	1	0	1	1	3	0	1	1	6	1	1	3	2
Inoviridae	5	18	11	5	7	14	3	14	10	32	13	16	8	13
Iridoviridae	223	155	1350	75	137	312	84	231	78	78	206	99	75	2539
Kyanoviridae	5	5	9	6	3	1	4	3	3	34	5	4	4	3
Lipothrixviridae	2	2	0	1	3	1	0	0	0	1	1	1	0	3
Marseilleviridae	123	70	100	49	59	58	38	36	51	172	68	76	39	93
Microviridae	3088	578	1377	2308	123	371	522	199	383	1116	639	920	190	85
Mimiviridae	650	869	502	286	522	434	216	450	430	1715	416	371	236	539
Mitoviridae	13	27	171	1	11	5	5	2	6	51	7	2	3	194
Nairoviridae	28	28	5	2	3	1	5	3	4	71	4	5	4	9
Nimaviridae	55	53	75	25	38	29	30	18	29	103	33	29	26	70
Nudiviridae	11	10	7	6	6	18	6	11	10	14	28	11	7	10
Orthoherpesviridae	378	303	77	136	273	269	123	184	252	370	272	136	240	98
Partitiviridae	14	18	5	0	6	13	5	1	3	49	6	4	5	6
Parvoviridae	9	5	52	0	0	0	0	0	0	0	0	0	0	8
Phycodnaviridae	181	179	206	76	161	126	76	85	101	323	156	108	100	196
Picornaviridae	5	2	2	5	4	9	3	4	0	7	9	2	1	2
Potyviridae	6	0	0	1	0	0	1	0	4	0	4	0	0	0
Poxviridae	251	286	254	90	208	227	120	219	148	691	242	124	112	243
Retroviridae	45109	28358	10566	115857	119083	73983	21554	55312	89516	5432	52273	83842	68999	14860
Rhabdoviridae	2	3	0	1	2	1	0	0	4	8	0	4	0	0
Schizomimiviridae	76	121	101	38	63	33	36	33	37	320	50	41	27	114
Spinareoviridae	13	62	3	11	7	5	0	0	3	86	2	11	8	6
Straboviridae	5	16	2	0	1	0	0	0	0	0	0	0	3	1
Ackermannviridae	0	1	0	0	0	0	2	0	0	1	0	1	0	1
Malacoherpesviridae	0	1	1	0	1	0	0	0	0	0	0	0	0	0
Phenuiviridae	0	3	0	0	0	0	0	0	1	9	0	1	0	0
Caulimoviridae	0	0	8	0	0	0	0	0	0	0	0	1	0	17
Chaseviridae	0	0	1	0	0	0	0	0	0	0	0	0	0	0
Circoviridae	0	0	3	0	7	0	0	0	7	0	0	5	3	1
Stanwilliamsviridae	0	0	1	0	1	0	1	2	1	0	0	0	1	0
Steigviridae	0	0	1	0	0	0	0	0	0	0	0	0	0	0
Adenoviridae	0	0	0	1	1	4	2	1	2	3	3	0	0	0
Metaviridae	0	0	0	0	1	0	0	0	0	0	0	1	0	0
Schitoviridae	0	0	0	0	0	0	1	0	0	0	0	0	0	0
Arenaviridae	0	0	0	0	0	0	0	0	29	0	0	0	22	0
Adintoviridae	0	0	0	0	0	0	0	0	0	1	0	0	0	0
Hepadnaviridae	0	0	0	0	0	0	0	0	0	1	0	0	0	0
Totiviridae	0	0	0	0	0	0	0	0	0	1	0	0	0	0
